# Supplementary material for: Diabetes mellitus as a risk factor for chemotherapy-induced peripheral neuropathy: a meta-analysis
Source: PubMed Central journal article supplement (PMC8550712; doi:10.1007/s00520-021-06321-7), 2021-06-03
Supplement: 520_2021_6321_MOESM3_ESM.pdf [file 520_2021_6321_MOESM3_ESM.pdf]

Table S3 Adjusted Newcastle–Ottawa scale (NOS) scores for the cohort studies

| Name          | Year | Selection  |            |            | Comparability |            |            | Outcome    |            |
|---------------|------|------------|------------|------------|---------------|------------|------------|------------|------------|
|               |      | Question 1 | Question 2 | Question 3 | Question 4    | Question 5 | Question 6 | Question 7 | Question 8 |
| Molassiotis A | 2019 | ☆          | ☆          | ☆          | -             | ☆☆         | ☆          | ☆          | ☆          |
| Chen C        | 2019 | ☆          | ☆          | ☆          | -             | ☆          | ☆          | ☆          | ☆          |
| Yamaguchi K   | 2018 | ☆          | ☆          | ☆          | -             | ☆☆         | ☆          | ☆          | ☆          |
| Hertz DL      | 2018 | ☆          | ☆          | ☆          | -             | ☆☆         | ☆          | ☆          | ☆          |
| Dolan ME      | 2017 | ☆          | ☆          | ☆          | -             | ☆          | ☆          | ☆          | ☆          |
| Pereira S     | 2016 | ☆          | ☆          | ☆          | -             | ☆          | ☆          | ☆          | ☆          |
| Ding XF       | 2015 | ☆          | ☆          | ☆          | -             | -          | ☆          | ☆          | ☆          |
| Eckhoff L     | 2014 | ☆          | ☆          | ☆          | -             | ☆          | ☆          | ☆          | ☆          |

Xue YJ

2013

☆

☆

☆

-

-

☆

☆

☆

---
