# Supplementary material for: Diabetes mellitus as a risk factor for chemotherapy-induced peripheral neuropathy: a meta-analysis
Source: PubMed Central journal article supplement (PMC8550712; doi:10.1007/s00520-021-06321-7), 2021-06-03
Supplement: 520_2021_6321_MOESM4_ESM.pdf [file 520_2021_6321_MOESM4_ESM.pdf]

Table S4: Adjusted Newcastle–Ottawa scale (NOS) scores for the case-control studies

| Name                  | Year | Selection  |            |            | Comparability |            |            | Outcome    |            |
|-----------------------|------|------------|------------|------------|---------------|------------|------------|------------|------------|
|                       |      | Question 1 | Question 2 | Question 3 | Question 4    | Question 5 | Question 6 | Question 7 | Question 8 |
| Gaballah A            | 2018 | ☆          | ☆          | ☆          | -             | ☆          | ☆          | ☆          | ☆          |
| Song SJ               | 2017 | ☆          | ☆          | ☆          | ☆             | ☆          | ☆          | ☆          | ☆          |
| Bao T                 | 2016 | ☆          | ☆          | ☆          | -             | ☆          | ☆          | ☆          | ☆          |
| Tanishima H           | 2016 | ☆          | ☆          | ☆          | -             | ☆          | ☆          | ☆          | ☆          |
| Wang YQ               | 2016 | ☆          | ☆          | ☆          | ☆             | ☆☆         | ☆          | ☆          | ☆          |
| Hershman, D. L        | 2016 | ☆          | ☆          | ☆          | -             | ☆          | ☆          | ☆          | ☆          |
| Shahriari-Ahmadi<br>A | 2015 | ☆          | ☆          | ☆          | -             | ☆          | ☆          | ☆          | ☆          |
| Kus T                 | 2015 | ☆          | ☆          | ☆          | ☆             | -          | ☆          | ☆          | ☆          |

|                          |      |   |   |   |   |    |   |   |   |
|--------------------------|------|---|---|---|---|----|---|---|---|
| de la Morena<br>Barrio P | 2015 | ☆ | ☆ | ☆ | ☆ | ☆☆ | ☆ | ☆ | ☆ |
| Johnson C                | 2015 | ☆ | ☆ | ☆ | - | -  | ☆ | ☆ | ☆ |
| Wang XY                  | 2013 | ☆ | ☆ | ☆ | - | ☆  | ☆ | ☆ | ☆ |
| Hashimoto N              | 2012 | ☆ | ☆ | ☆ | - | ☆  | ☆ | ☆ | ☆ |
| Kawakami K               | 2012 | ☆ | ☆ | ☆ | - | ☆  | ☆ | ☆ | ☆ |
| Vincenzi B               | 2012 | ☆ | ☆ | ☆ | - | ☆  | ☆ | ☆ | ☆ |
| Uwah AN                  | 2012 | ☆ | ☆ | ☆ | ☆ | ☆  | ☆ | ☆ | ☆ |
| Ramanathan, R. K         | 2010 | ☆ | ☆ | ☆ | - | ☆  | ☆ | ☆ | ☆ |

---
